# Supplementary material for: The Landscape of Accessible Chromatin and Developmental Transcriptome Maps Reveal a Genetic Mechanism of Skeletal Muscle Development in Pigs
Source: MDPI journal article supplement (doi:10.3390/ijms24076413), 2023-03-29
Supplement: s1 [file s1]

Distrubution of Sample Expression

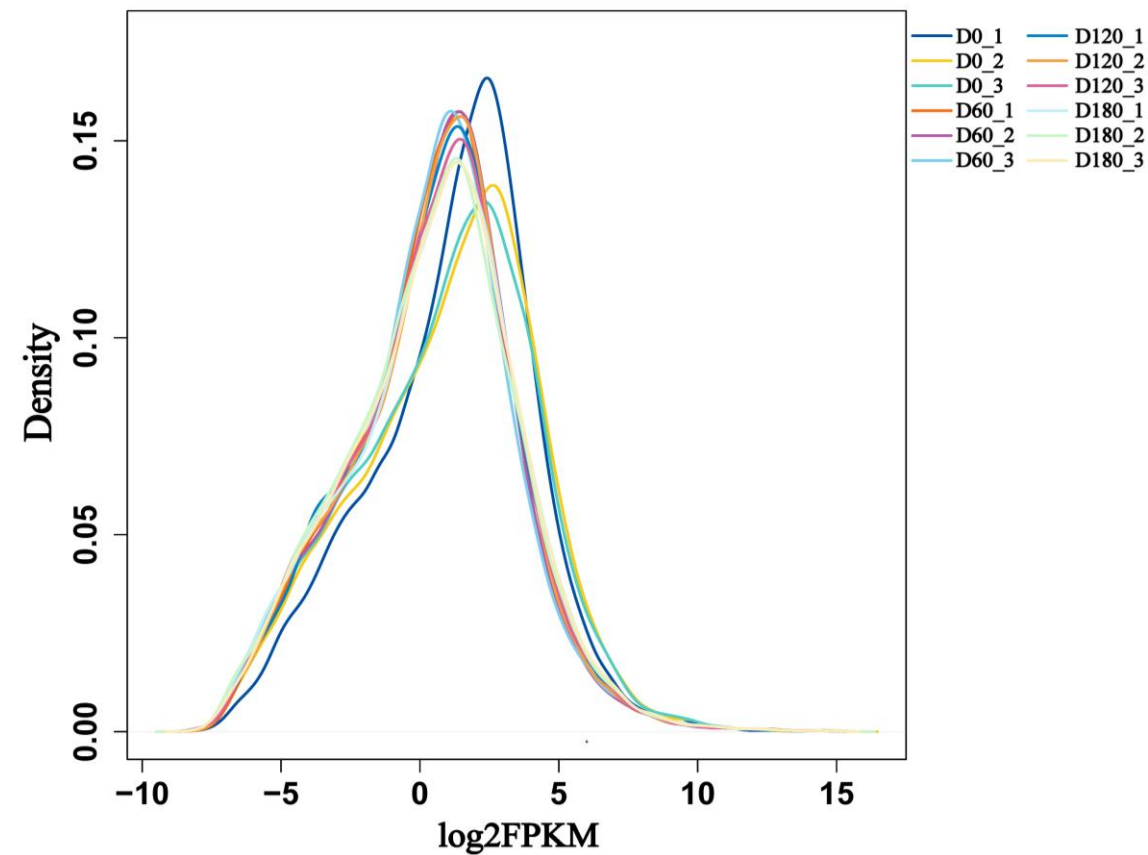

**Figure S1.** Density distribution map of gene expression in each sample. (Nore:The abscissa is log2(FPKM)), which represents the logarithm of gene expression in each sample. The higher the value, the higher the gene expression. The ordinate is the density of genes, different colors represent different samples, and the peak of the density distribution curve represents the area where the gene expression concentration of the whole sample is concentrated.).

Cluster Dendrogram

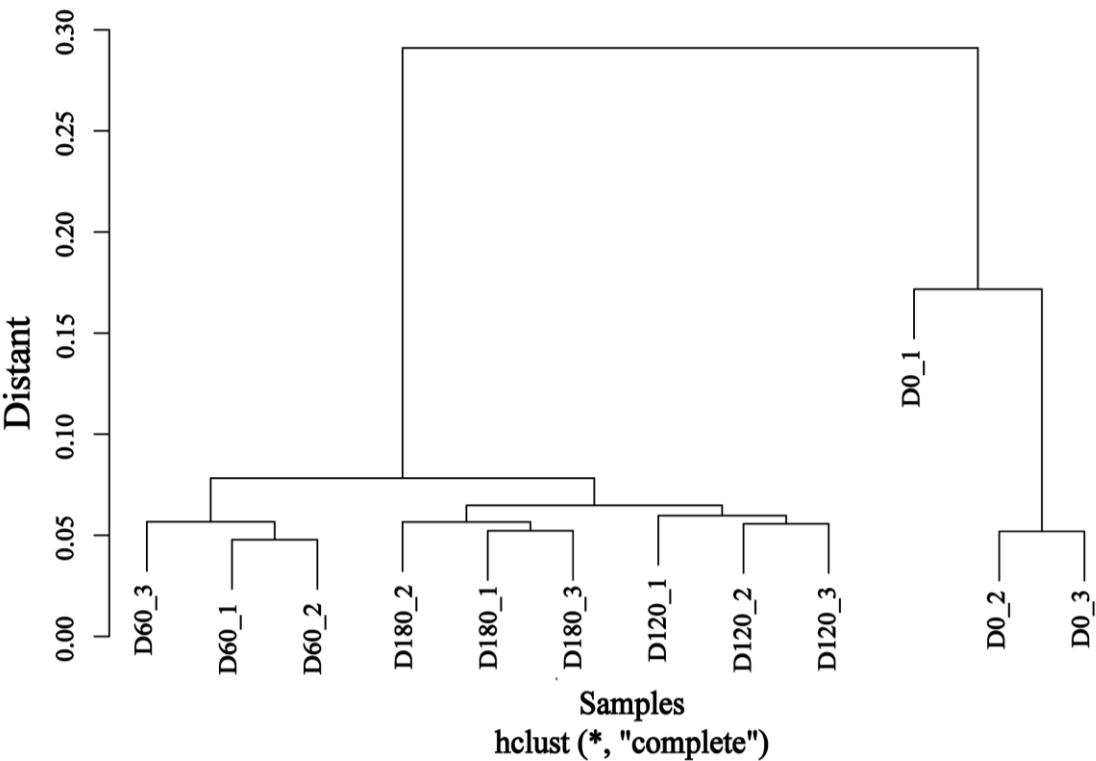

**Figure S2.** Clustered dendrogram of 12 samples of skeletal muscle from Landrace pigs.

S3

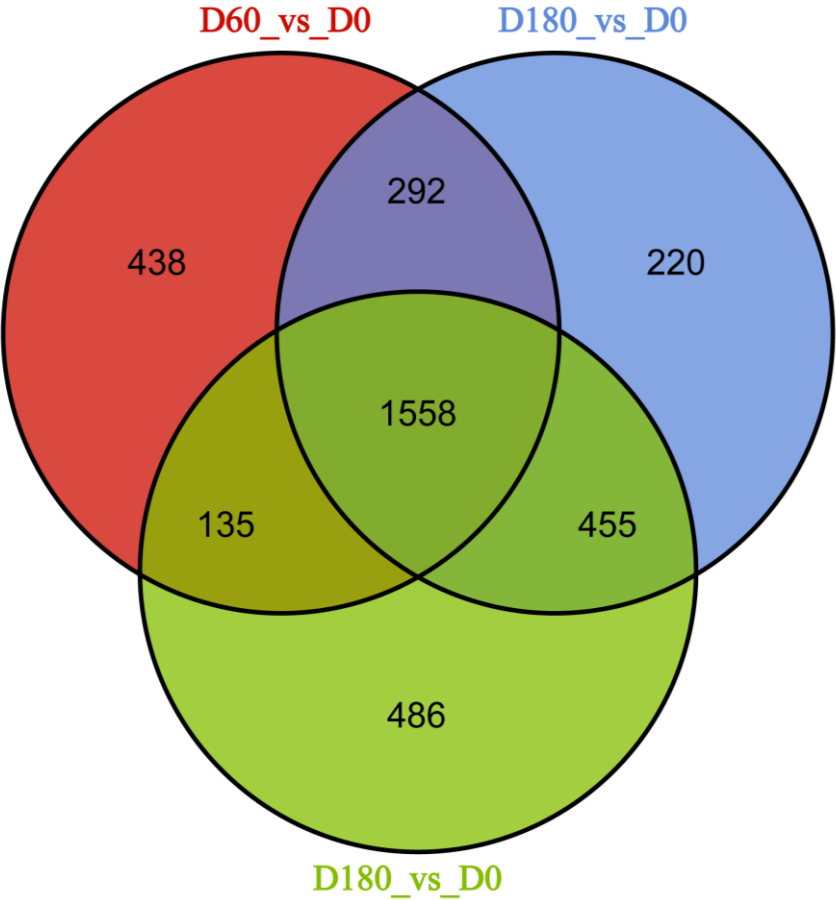

**Figure S3** Venn diagram of three groups D60vsD0, D120vsD0, and D180vsS0 of landrace pig skeletal muscle.

S4

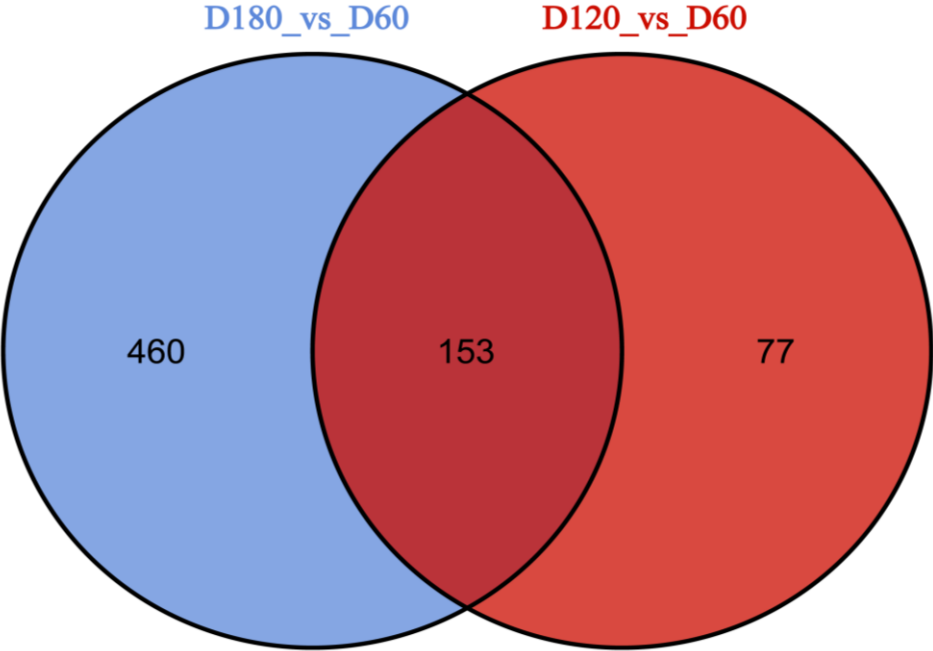

**Figure S4.** Venn diagram of two groups D180vsD60, D120vsD60, of landrace pig skeletal muscle.

S5

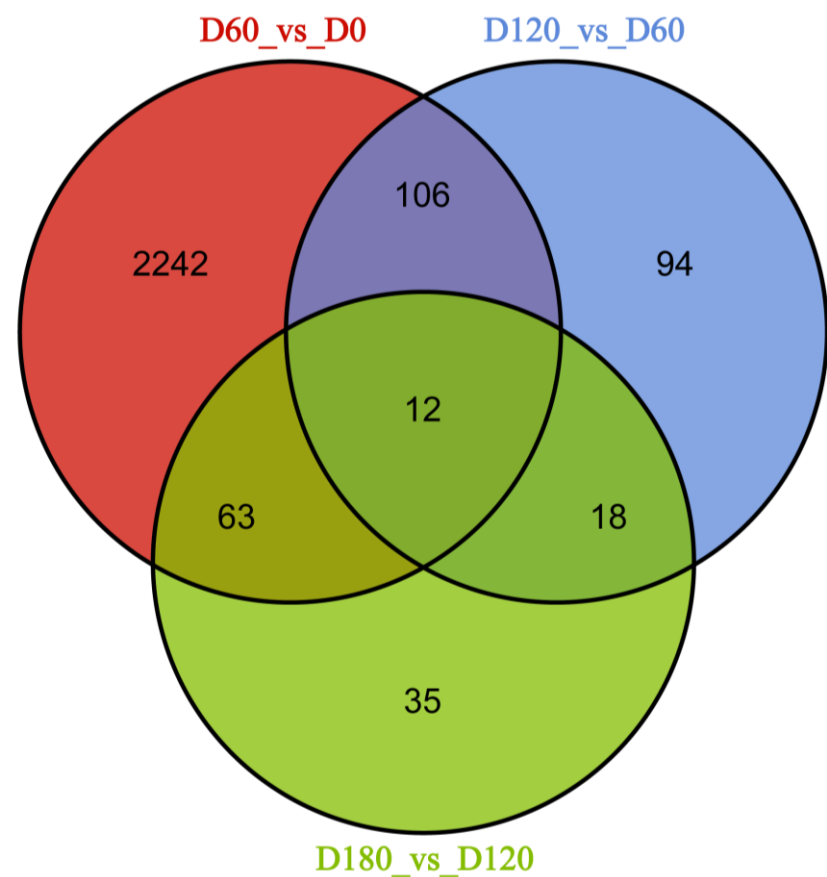

**Figure S5.** Venn diagram of three groups D60vsD0, D120vsD60, and D180vsD120 of landrace pig skeletal muscle.

S6

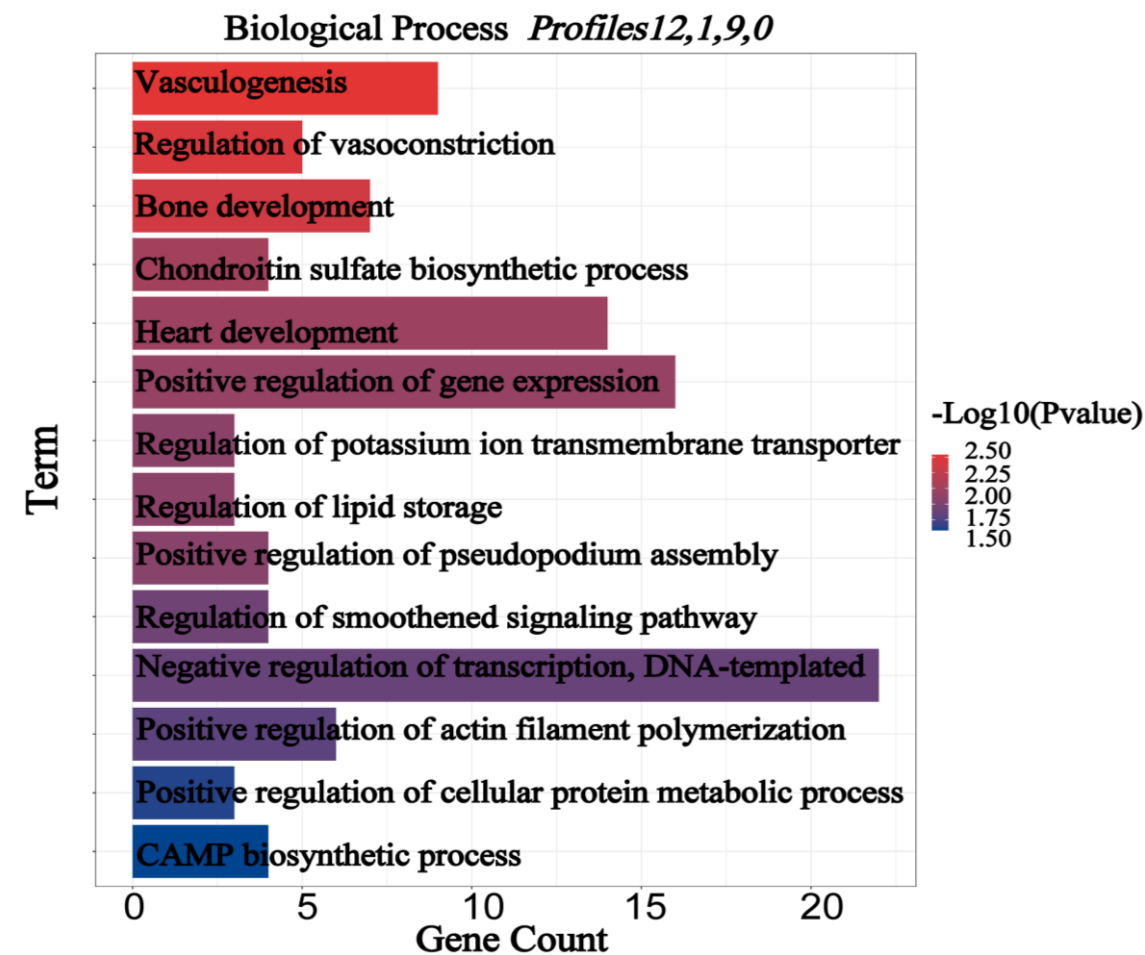

**Figure S6.** The biological process map of GO enrichment analysis after all genes in Profiles 12, 1, 9, and 0 was obtained after trend analysis during skeletal muscle development in Landrace pigs.

S7

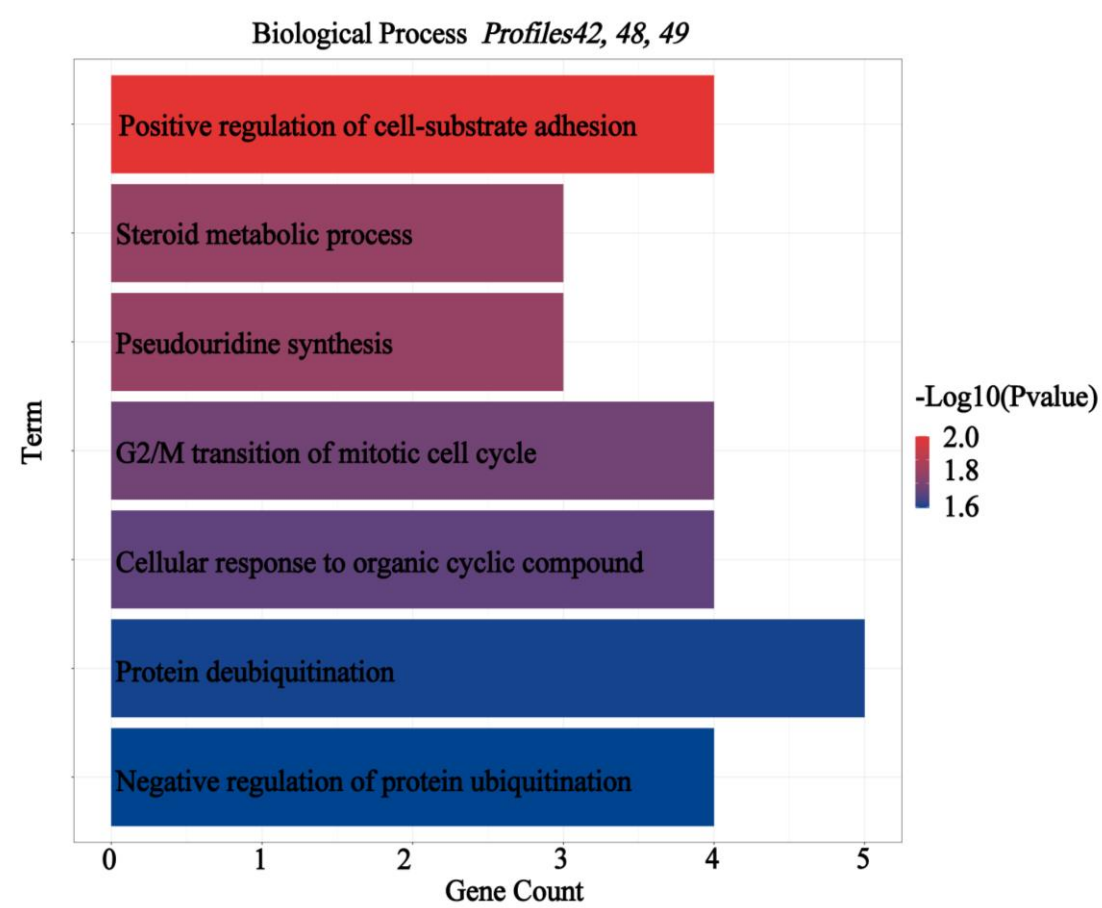

**Figure S7.** The biological process map of GO enrichment analysis after all genes in Profiles 42, 48, 49 and 0 was obtained after trend analysis during skeletal muscle development in Landrace pigs.

S8

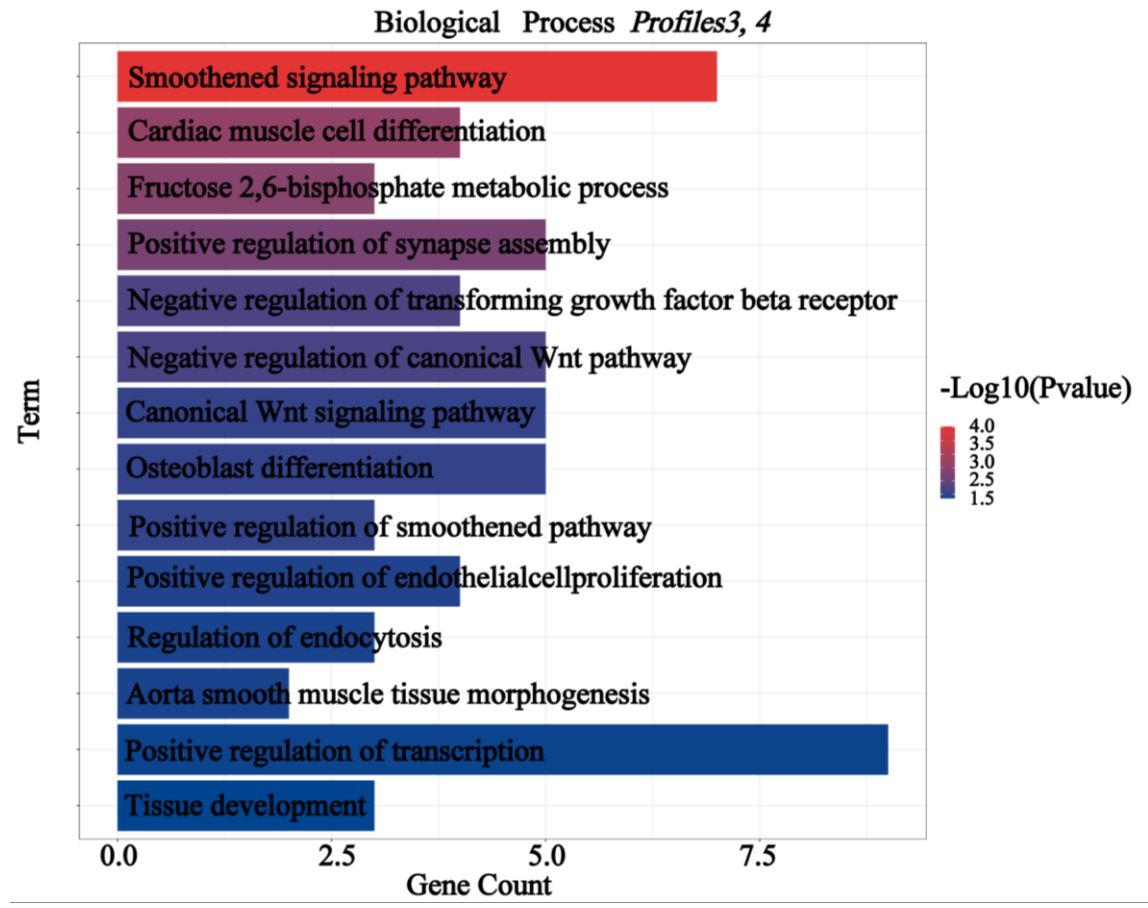

**Figure S8.** The biological process map of GO enrichment analysis after all genes in Profiles 3 and 4 was obtained after trend analysis during skeletal muscle development in Landrace pigs.

S9

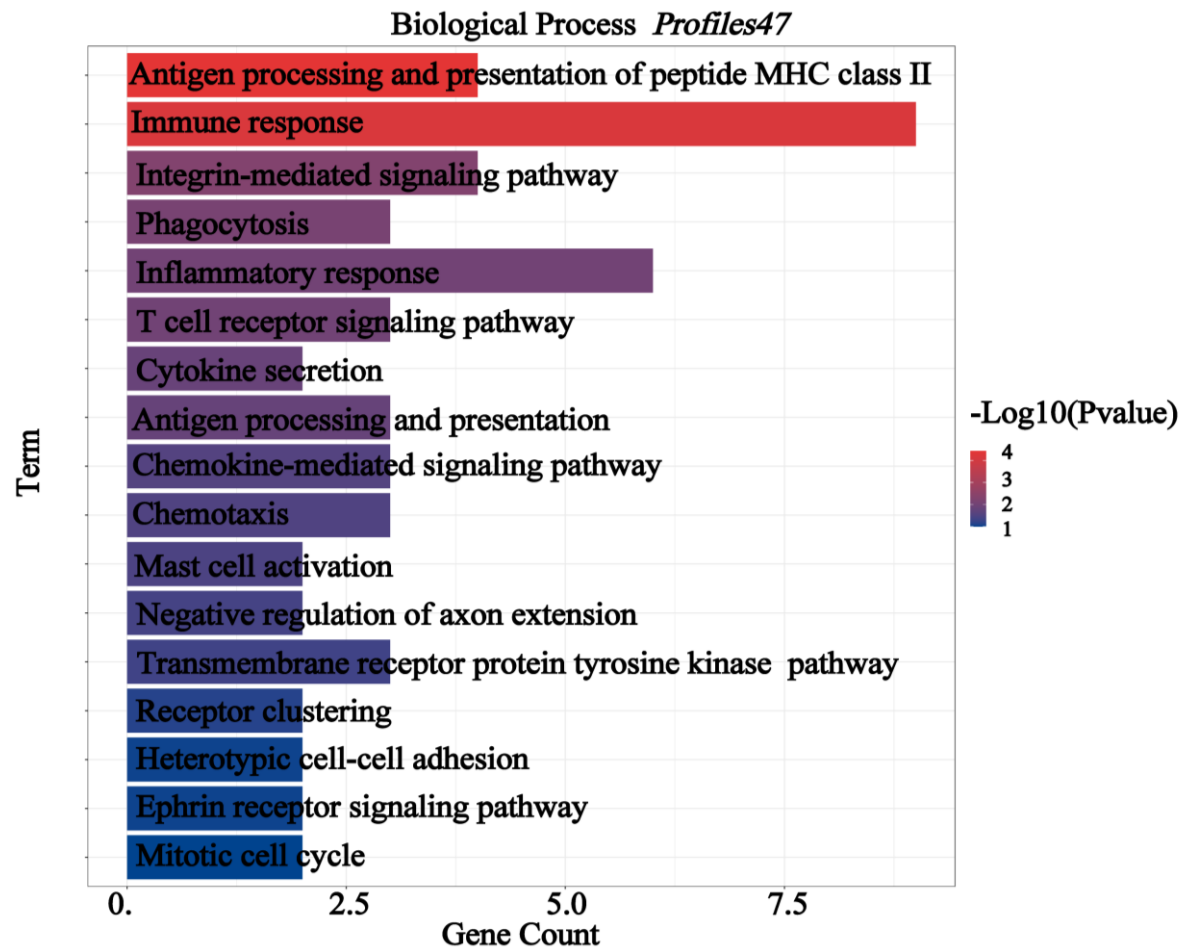

**Figure S9.** The biological process map of GO enrichment analysis after all genes in Profiles 47 was obtained after trend analysis during skeletal muscle development in Landrace pigs.

S10

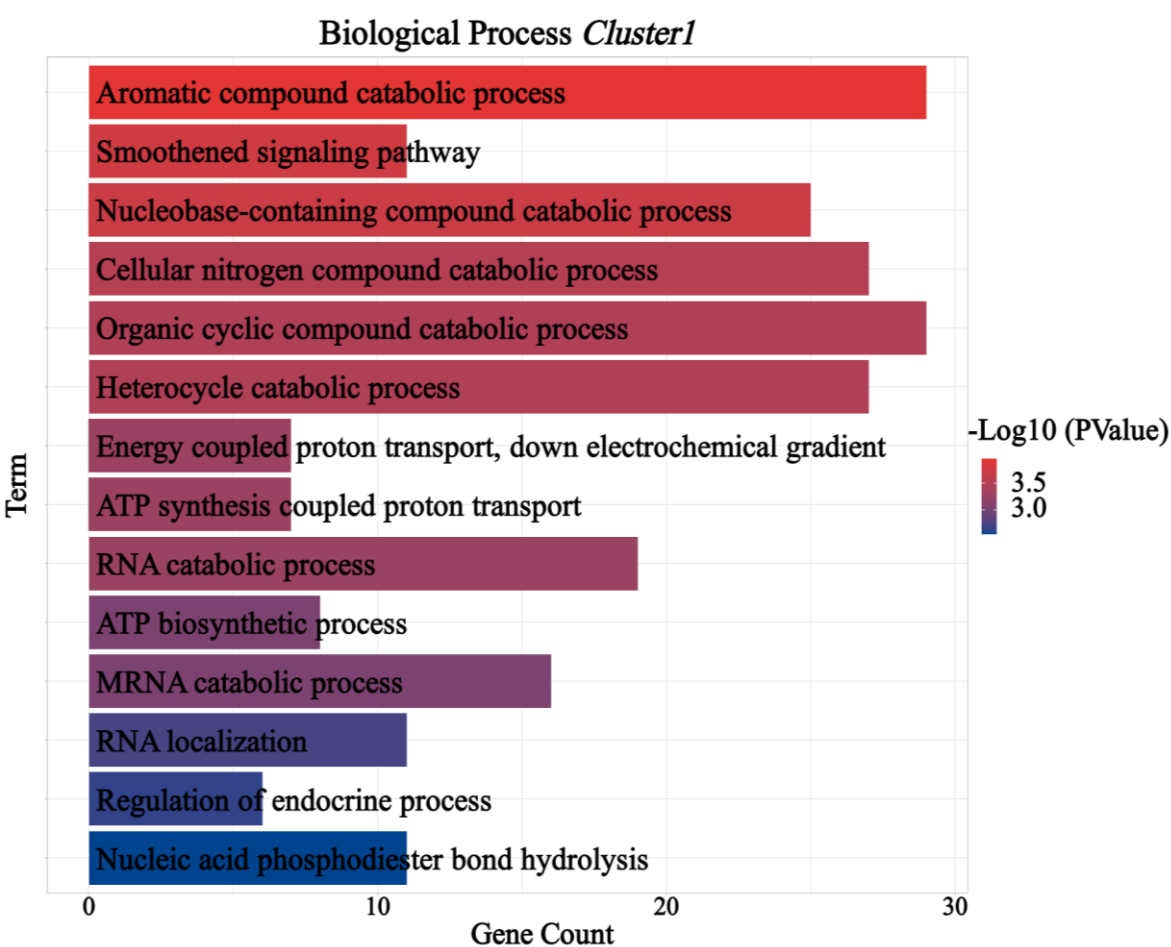

**Figure S10.** The biological process map of GO enrichment analysis after all genes in Cluster 1 was obtained after trend analysis during skeletal muscle development in Landrace pigs.

S11

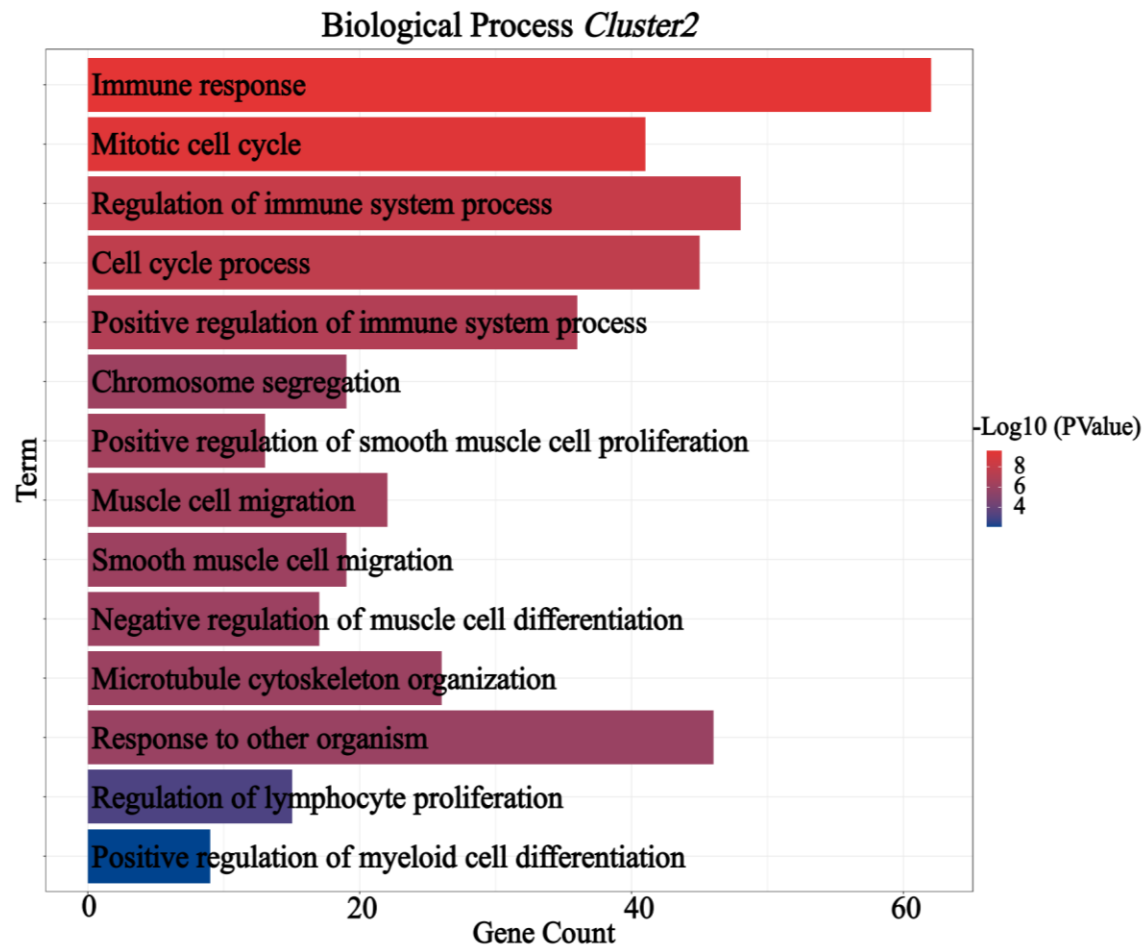

**Figure S11.** The biological process map of GO enrichment analysis after all genes in Cluster 2 was obtained after trend analysis during skeletal muscle development in Landrace pigs.

S12

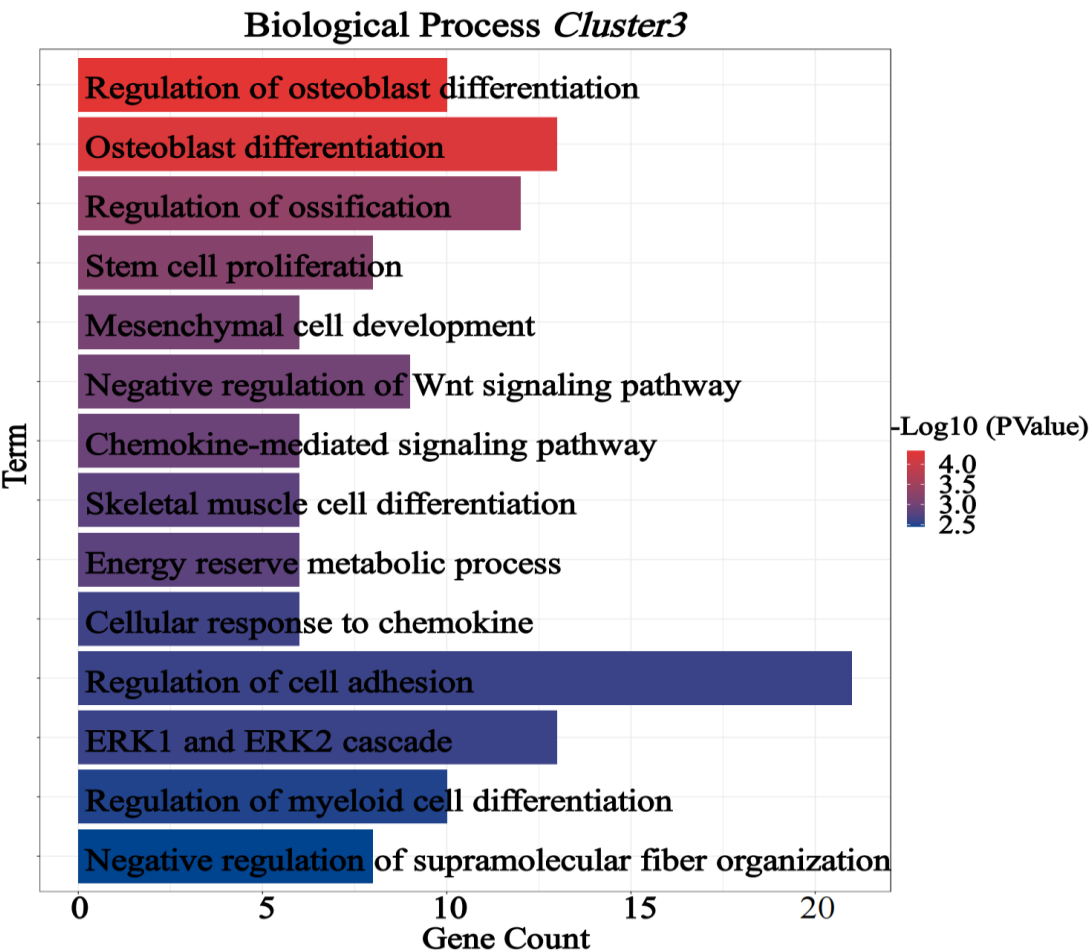

**Figure S12.** The biological process map of GO enrichment analysis after all genes in Cluster 3 was obtained after trend analysis during skeletal muscle development in Landrace pigs.

S13

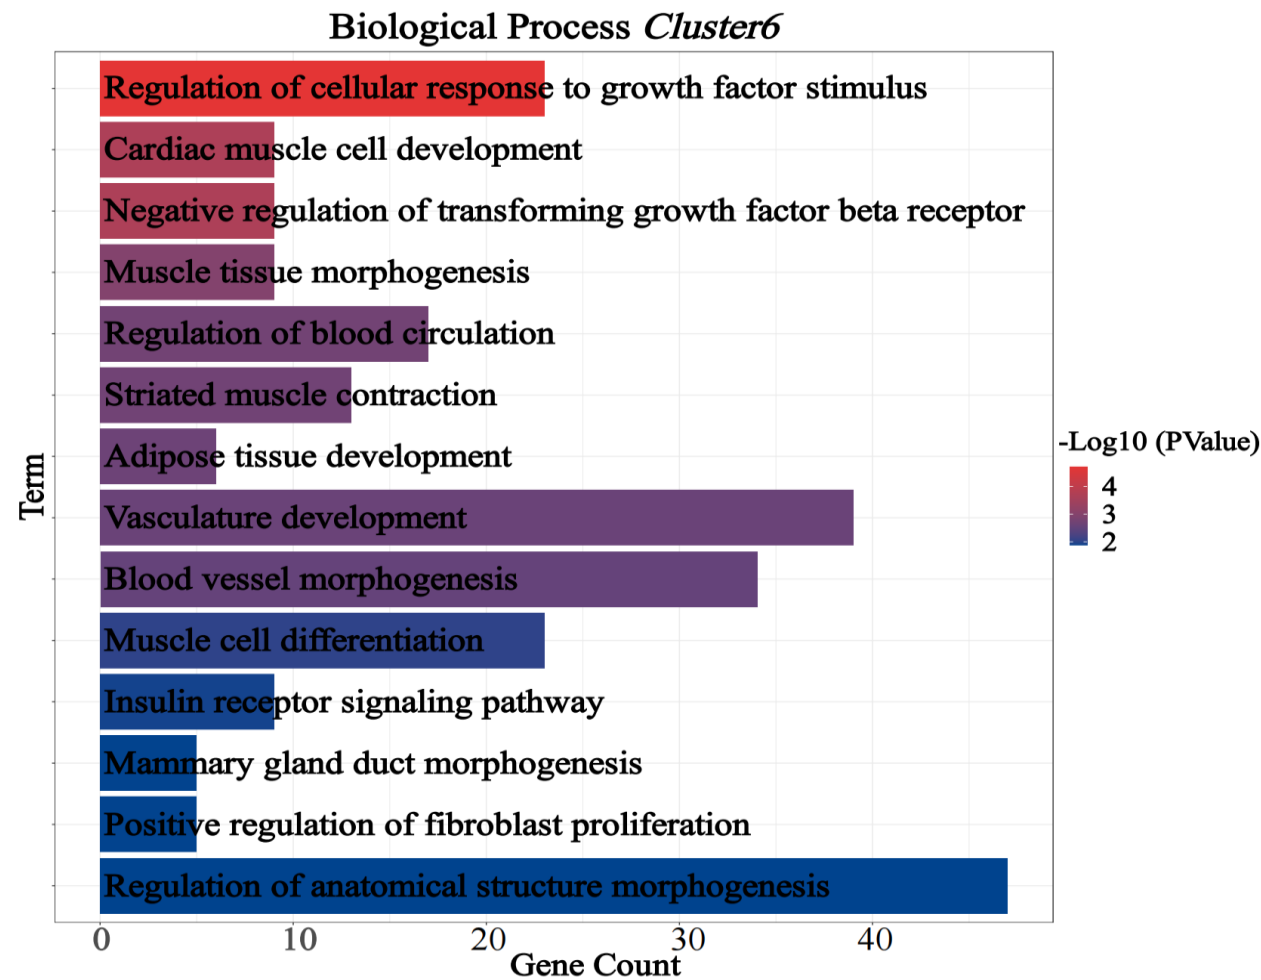

**Figure S13.** The biological process map of GO enrichment analysis after all genes in Cluster 6 was obtained after trend analysis during skeletal muscle development in Landrace pigs.

S14

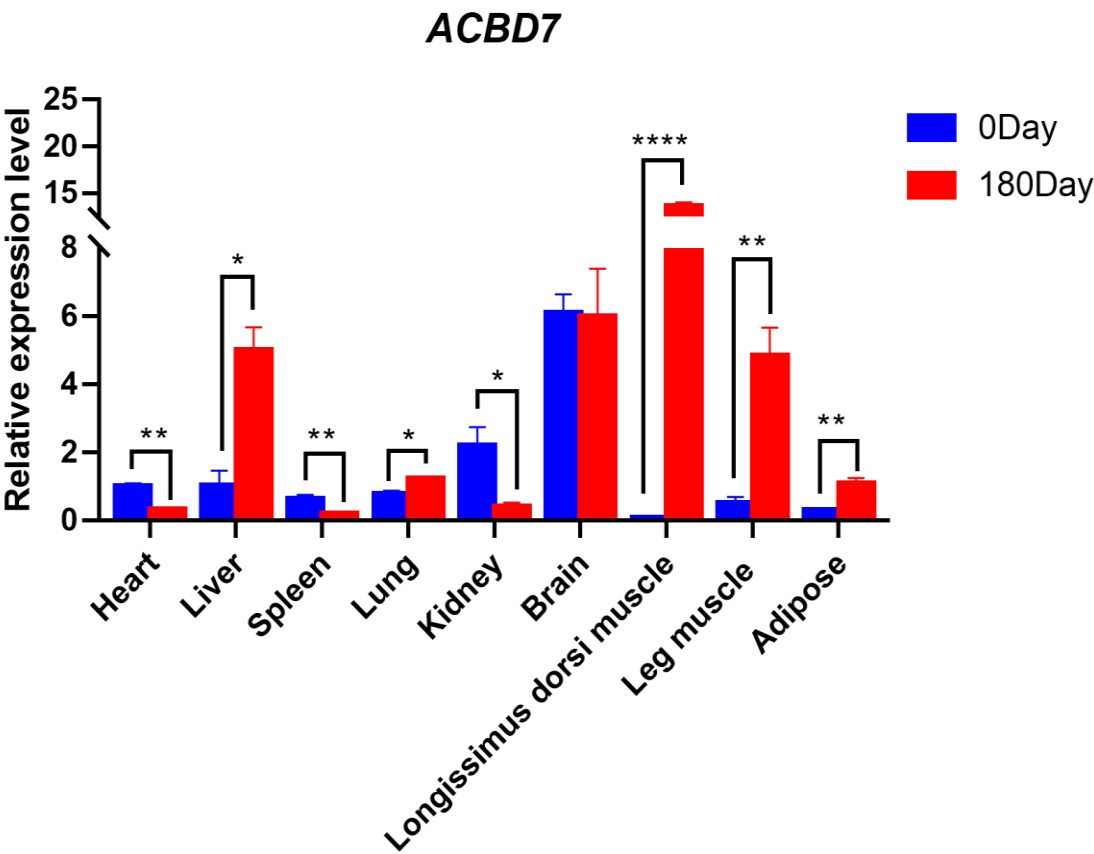

**Figure S14.** Expression of ACBD7 Gene in Different Tissues of Landrace pig. Note: \*means significant difference ( $P < 0.05$ ); \*\*means very significant difference ( $P < 0.01$ ); \*\*\*\*means very significant difference ( $P < 0.0001$ ).



**Table S1.** The summary of data generated by RNA sequencing.

| Sample | Raw Reads<br>Number | Raw Bases<br>Number | Raw Q30<br>Bases Rate(%) | Clean Reads<br>Number | Clean Bases<br>Number | Clean Reads<br>Rate(%) | Clean Q30<br>Bases Rate(%) |
|--------|---------------------|---------------------|--------------------------|-----------------------|-----------------------|------------------------|----------------------------|
| D0-1   | 44,924,186          | 6,738,627,900       | 93.06                    | 44,010,612            | 6,601,591,800         | 97.97                  | 93.37                      |
| D0-2   | 45,375,928          | 6,806,389,200       | 93.11                    | 44,203,674            | 6,630,551,100         | 97.42                  | 93.55                      |
| D0-3   | 43,455,204          | 6,518,280,600       | 93.46                    | 42,280,234            | 6,342,035,100         | 97.30                  | 93.73                      |
| D60-1  | 46,716,874          | 7,007,531,100       | 94.70                    | 44,759,642            | 6,713,946,300         | 95.81                  | 95.00                      |
| D60-2  | 46,546,304          | 6,981,945,600       | 94.79                    | 45,345,610            | 6,801,841,500         | 97.42                  | 95.10                      |
| D60-3  | 45,164,572          | 6,774,685,800       | 94.63                    | 44,024,034            | 6,603,605,100         | 97.47                  | 94.98                      |
| D120-1 | 48,016,028          | 7,202,404,200       | 94.62                    | 46,466,284            | 6,969,942,600         | 96.77                  | 95.01                      |
| D120-2 | 46,678,706          | 7,001,805,900       | 94.88                    | 45,475,138            | 6,821,270,700         | 97.42                  | 95.21                      |
| D120-3 | 46,851,850          | 7,027,777,500       | 94.79                    | 44,986,684            | 6,748,002,600         | 96.02                  | 95.12                      |
| D180-1 | 48,145,458          | 7,221,818,700       | 94.90                    | 46,185,784            | 6,927,867,600         | 95.93                  | 95.20                      |
| D180-2 | 45,734,972          | 6,860,245,800       | 94.89                    | 44,635,138            | 6,695,270,700         | 97.59                  | 95.19                      |
| D180-3 | 46,137,732          | 6,920,659,800       | 94.98                    | 44,754,252            | 6,713,137,800         | 97.00                  | 95.30                      |



**Table S2.** ATAC-seq data statistics.

| <b>Sample ID</b> | <b>Raw reads</b> | <b>Raw Bases (G)</b> | <b>Raw Q30 (%)</b> | <b>Raw GC (%)</b> | <b>Clean Reads</b> | <b>Clean Bases (G)</b> | <b>Clean Q30 (%)</b> | <b>Clean GC (%)</b> | <b>Clean reads rate (%)</b> |
|------------------|------------------|----------------------|--------------------|-------------------|--------------------|------------------------|----------------------|---------------------|-----------------------------|
| D0-1             | 192,824,860      | 28.92                | 93.74              | 49.84             | 186,839,412        | 22.29                  | 97.27                | 50.03               | 96.9                        |
| D0-2             | 202,187,430      | 30.33                | 92.97              | 48.98             | 196,243,118        | 21.88                  | 97.30                | 48.93               | 97.06                       |
| D0-3             | 228,890,516      | 34.33                | 92.81              | 49.68             | 222,576,452        | 23.51                  | 97.54                | 50.01               | 97.24                       |
| D60-1            | 241,683,452      | 36.25                | 91.06              | 45.28             | 224,130,406        | 29.57                  | 95.45                | 44.68               | 92.74                       |
| D60-2            | 118,611,082      | 17.79                | 87.49              | 47.68             | 111,748,678        | 10.04                  | 95.11                | 47.50               | 94.21                       |
| D60-3            | 127,506,464      | 19.13                | 86.72              | 49.03             | 118,732,552        | 10.69                  | 94.90                | 48.64               | 93.12                       |
| D120-1           | 160,902,558      | 24.14                | 88.33              | 47.09             | 149,387,592        | 15.80                  | 94.77                | 46.34               | 92.84                       |
| D120-2           | 179,843,452      | 26.98                | 88.48              | 48.11             | 167,492,802        | 18.28                  | 94.44                | 47.73               | 93.13                       |
| D120-3           | 158,216,190      | 23.73                | 88.4               | 47.1              | 148,204,958        | 15.79                  | 94.40                | 46.62               | 93.67                       |
| D180-1           | 190,522,382      | 28.58                | 90.91              | 44.84             | 181,234,408        | 22.75                  | 95.32                | 43.98               | 95.12                       |
| D180-2           | 117,259,428      | 17.59                | 85.67              | 46.63             | 112,596,366        | 9.52                   | 94.91                | 45.97               | 96.02                       |
| D180-3           | 168,450,862      | 25.27                | 91.98              | 46.47             | 161,580,512        | 18.00                  | 97.12                | 45.23               | 95.92                       |

**Table S3.** Integrative RNA-seq and ATAC-seq analysis of GO and KEGG enrichment results for overlapping genes in D60vsD0, D120vsD0, D180vsDD0, D120vsD60, D180vsD60 and D180vsD120 groups.

| Group     | Category           | Term                                                                                                                       | PValue | Genes                                             |
|-----------|--------------------|----------------------------------------------------------------------------------------------------------------------------|--------|---------------------------------------------------|
| D60vsD0   | Biological Process | GO:0071447~cellular response to hydrogen peroxide                                                                          | 0.0002 | <i>DAPK1, PRKD1</i>                               |
|           |                    | GO:0031647~regulation of protein stability                                                                                 | 0.0008 | <i>TRIM24, NEDD4L, PRKD1</i>                      |
|           |                    | GO:0043536~positive regulation of blood vessel endothelial cell migration                                                  | 0.0032 | <i>ADAM17, PRKD1</i>                              |
|           |                    | GO:0009887~animal organ morphogenesis                                                                                      | 0.0221 | <i>ATRNL1, NTN4, NTN1</i>                         |
|           |                    | GO:0007219~Notch signaling pathway                                                                                         | 0.0248 | <i>ADAM17, MAML3, ZNF423</i>                      |
|           | Molecular Function | GO:0004672~protein kinase activity                                                                                         | 0.0260 | <i>PTK7, TRIM24, PRKD1</i>                        |
|           |                    | GO:0004674~protein serine/threonine kinase activity                                                                        | 0.0430 | <i>MAPK10, DAPK1, PRKD1</i>                       |
|           | Cellular Component | GO:0005911~cell-cell junction                                                                                              | 0.0042 | <i>ADAM17, PTK7, PRKD1</i>                        |
|           |                    | GO:0015629~actin cytoskeleton                                                                                              | 0.0098 | <i>ARHGAP32, ADAM17, DAPK1, CTNNA1</i>            |
|           |                    | GO:0005938~cell cortex                                                                                                     | 0.0216 | <i>ARHGAP32, PRKD1</i>                            |
|           | KEGG               | ssc04910:Insulin signaling pathway                                                                                         | 0.0330 | <i>MAPK10, PDE3B, PRKAG2</i>                      |
|           |                    | ssc04022:cGMP-PKG signaling pathway                                                                                        | 0.0080 | <i>PLCB4, PRKCE, PDE3B, CREB3L2, ITPR1, MYLK,</i> |
|           |                    | ssc04310:Wnt signaling pathway                                                                                             | 0.0080 | <i>MAPK10, APC2, TCF7L2, PLCB4</i>                |
| D120vsD60 | Biological Process | GO:0032868~response to insulin                                                                                             | 0.0190 | <i>EGR1, ZBTB7B</i>                               |
|           |                    | GO:0035914~skeletal muscle cell differentiation                                                                            | 0.0220 | <i>EGR1, EGR2</i>                                 |
|           | Molecular Function | GO:0001228~transcriptional activator activity, RNA polymerase II transcription regulatory region sequence-specific binding | 0.0220 | <i>EGR1, EGR2, ZBTB7B</i>                         |
|           | Cellular Component | GO:0005654~nucleoplasm                                                                                                     | 0.0070 | <i>EGR1, EGR2, CDK1, ZBTB7B, ASF1B</i>            |

| Group      | Category           | Term                                                                                    | PValue   | Genes                                                   |
|------------|--------------------|-----------------------------------------------------------------------------------------|----------|---------------------------------------------------------|
| D180vsD0   | Biological Process | GO:0007264~small GTPase mediated signal transduction                                    | 4.53E-04 | <i>TIAM2, ARHGAP32, SH2D3A, RASGEF1B,</i>               |
|            |                    | GO:0045766~positive regulation of angiogenesis                                          | 5.75E-04 | <i>AKT3, ITGB8, PRKCA, PRKDI,</i>                       |
|            |                    | GO:0043536~positive regulation of blood vessel endothelial cell migration               | 0.0029   | <i>ADAM17, PRKCA, PRKDI</i>                             |
|            | Molecular Function | GO:0005085~guanyl-nucleotide exchange factor activity                                   | 9.85E-04 | <i>TIAM2, SH2D3A, IQSEC1, RASGEF1B,</i>                 |
|            |                    | GO:0003779~actin binding                                                                | 0.0040   | <i>FMNL2, ALKBH4, CAPZB, MAP1B,</i>                     |
|            | Cellular Component | GO:0031012~extracellular matrix                                                         | 4.69E-04 | <i>COL28A1, ADAMTSL1, SPON1, MMP14,</i>                 |
|            |                    | GO:0014069~postsynaptic density                                                         | 0.0069   | <i>ARHGAP32, DLG1, CAPZB, CTNND2,</i>                   |
|            | KEGG               | ssc04010:MAPK signaling pathway                                                         | 0.006    | <i>AKT3, RAPGEF2, FLNB, PRKCA, MAPT, DUSP16, MAP3K4</i> |
|            |                    | ssc04015:Rap1 signaling pathway                                                         | 0.0166   | <i>ADCY9, AKT3, PRKCA, PRKDI, ACTG1</i>                 |
| D180vsD120 | Biological Process | GO:0060716~labyrinthine layer blood vessel development                                  | 0.0056   | <i>HES1, CCN1</i>                                       |
|            |                    | GO:0030513~positive regulation of BMP signaling pathway                                 | 0.0111   | <i>HES1, CCN1</i>                                       |
|            |                    | GO:0035914~skeletal muscle cell differentiation                                         | 0.0121   | <i>EGR1, FOS</i>                                        |
|            | Molecular Function | GO:0005654~nucleoplasm                                                                  | 0.099    | <i>EGR1, HES1, FOS</i>                                  |
|            | Cellular Component | GO:0061629~RNA polymerase II sequence-specific DNA binding transcription factor binding | 0.0303   | <i>HES1, FOS</i>                                        |
|            | KEGG               | ssc04933:AGE-RAGE signaling pathway in diabetic complications                           | 0.0448   | <i>EGR1, DIAPH1</i>                                     |
|            |                    | ssc04928:Parathyroid hormone synthesis, secretion and action                            | 0.0460   | <i>EGR1, FOS</i>                                        |

| Group     | Category           | Term                                                                      | PValue   | Genes                                                                    |
|-----------|--------------------|---------------------------------------------------------------------------|----------|--------------------------------------------------------------------------|
| D120vsD0  | Biological Process | G0:0071900~regulation of protein serine/threonine kinase activity         | 0.0017   | <i>UVRAG, PRKAG2, PRKAG3</i>                                             |
|           |                    | G0:0071447~cellular response to hydroperoxide                             | 0.0058   | <i>DAPK1, PRKD1</i>                                                      |
|           |                    | G0:0043536~positive regulation of blood vessel endothelial cell migration | 0.0097   | <i>ADAM17, PRKCA, PRKD1</i>                                              |
|           |                    | G0:0055013~cardiac muscle cell development                                | 0.0202   | <i>MYO18B, MTOR, PLEC</i>                                                |
|           | Molecular Function | G0:0005524~ATP binding                                                    | 1.36E-05 | <i>FBH1, PRKAG2, ATP1A1, MYLK3, NMNAT3, MAPK10, MYO3B, PRKD1, CDK13,</i> |
|           | Cellular Component | G0:0015629~actin cytoskeleton                                             | 0.0488   | <i>ADAM17, MYO3B, DAPK1, CTNNA1,</i>                                     |
|           | KEGG               | ssc04919:Thyroid hormone signaling pathway                                | 0.0020   | <i>STAT1, GATA4, PRKCA, ATP1A1, PFKM, RXRG, MED12L, MTOR</i>             |
|           |                    | ssc04152:AMPK signaling pathway                                           | 0.0021   | <i>CPT1A, SCD5, PRKAG2, PFKM, MTOR, ACACA, FBP2, PRKAG3</i>              |
|           |                    | ssc04935:Growth hormone synthesis, secretion and action                   | 0.0303   | <i>MAPK10, STAT1, PRKCA, ADCY8, MTOR</i>                                 |
| D180vsD60 |                    |                                                                           |          | <i>DGKB, KPNA5, DGKB, KPNA5, RORB, GALNT1, KCTD8,</i>                    |

**Table S4. The fluorescence intensity of PK15 cells transfected for 24 h, 48 h, and 72 h was analyzed using Image J software.**

| <b>Times</b> | <b>Mean fluorescence intensity ( Mean )</b> |
|--------------|---------------------------------------------|
| 24h          | 35.79±9.57 <sup>b</sup>                     |
| 48h          | 78.50±12.48 <sup>a</sup>                    |
| 72h          | 88.05±11.94 <sup>a</sup>                    |

**Note: a,b indicates data in the same row with completely different lowercase letters indicates significant difference ( $p < 0.05$ ), and data with any same lowercase letters or no letters indicates no significant difference ( $p > 0.05$ ).**

**Table S5. The primer sequences for RT-PCR**

| Genes           | Primer sequences(5'→3')      |                         | Product /bp | GenBank accession No. |
|-----------------|------------------------------|-------------------------|-------------|-----------------------|
| <i>TMEM220</i>  | F:ACCCTCTTGTCACAGGTAGC       | R:TGACACAGGCTCATCCATGC  | 187         | XM_003131997.5        |
| <i>THBS1</i>    | F:GGATGGTCGAGGTGATGCTT       | R:CTGATGGCGTACAACCCAGT  | 178         | NM_001244536.1        |
| <i>RHOB</i>     | F:GAGAACATCCCCGAGAAGTGG      | R:ACTCGAGGTAGTCGTAGGCTT | 199         | NM_001123189.1        |
| <i>PLK3</i>     | F:TCTGTGCCCTGAGAACTGC        | R:TTGAAAAGCACAGCCACACG  | 166         | XM_003128058.4        |
| <i>MYL9</i>     | F:CCTCAGGCTTCATCCACGAG       | R:ACCGTGTTTGAGGATGCGAG  | 158         | NM_001244472.1        |
| <i>LRTM1</i>    | F:TTTCCATTCCCTCCCACAGC       | R:GGCATGGATTCTAGGAGGGC  | 159         | XM_021068978.1        |
| <i>IL18</i>     | F:GCTGCTGAACCGGAAGACAA       | R:AAACACGGCTTGATGTCCCT  | 192         | NM_213997.1           |
| <i>HES1</i>     | F:CAACGCCATGACCTACCCTG       | R:CGAATACCTTTGCCGCCTCT  | 200         | NM_001195231.1        |
| <i>FOS</i>      | F:TCAGAGCATTGGCAGAAGGG       | R:GTGTGTCAGTCAGCTCCCTC  | 134         | NM_001123113.1        |
| <i>CCN1</i>     | F:CACCAATGACAACCCCGACT       | R:ACTTGGGCCCGGTACTTCTTC | 182         | NC_010446.5           |
| <i>BMP2</i>     | F:TTCTTAGACGGTCTGCGGTC       | R:GCAACTCAAACCTCGCTGAGG | 180         | NM_001195399.1        |
| <i>ACBD7</i>    | F:TGAAGACCAGGCCAGATGAC       | R:GTTCCAAGCTTCCCAGTTAGC | 134         | XM_003357745.4        |
| <i>MyHC-I</i>   | F:GGCCCCTTCCAGCTTGA          | R:TGGCTGCGCCTTGTTTT     | 63          | L10129.1              |
| <i>MyHC-IIa</i> | F:TTAAAAAGCTCCAAGAACTGTTTCA  | R:CCATTTCCTGGTCGGAATC   | 100         | U11772                |
| <i>MyHC-IIb</i> | F:CACTTTAAGTAGTTGTCTGCCTTGAG | R:GGCAGCAGGGCACTAGATGT  | 80          | U90720                |
| <i>MyHC-IIx</i> | F:AGCTTCAAGTTCTGCCCCACT      | R:GGCTGCGGGTTATTGATGG   | 76          | U90719.1              |
| <i>CD36</i>     | F:GGGTAAAAACAGGCACGGAAG      | R:GCACCATTTGGGCTGTAGGAA | 199         | NM_001044622.1        |
| <i>FABP4</i>    | F:CATTAGATCAGAAAGTACCT       | R:ATCTAAGGTTATGGTGCTCT  | 112         | NM_001002817.1        |
| <i>ATGL</i>     | F:CATCCGTGGCTGCCTGGTGAA      | R:CCTGGCGGCGAAGTGGGTAT  | 121         | EU373817.1            |
| <i>β-actin</i>  | F:ACGTCGCACTGGATTTCGAG       | R:TGTCAGCAATGCCAGGGTAC  | 282         | NM_205518.2           |
